# Supplementary material for: A comparative study of the effects of Aducanumab and scanning ultrasound on amyloid plaques and behavior in the APP23 mouse model of Alzheimer disease
Source: PubMed Central journal article supplement (PMC8035770; doi:10.1186/s13195-021-00809-4), 2021-04-09

# Supplementary Figure 2

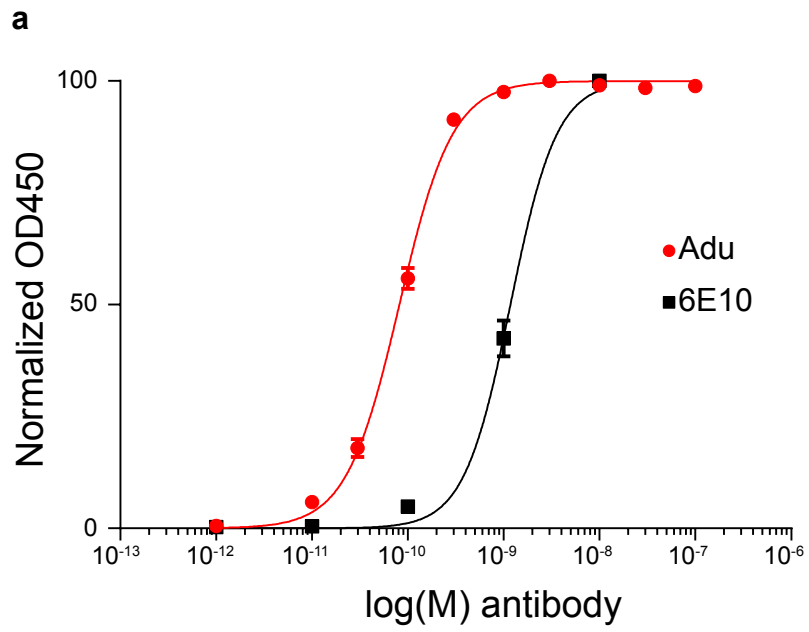

Supplement: 13195_2021_809_MOESM2_ESM.pdf [file 13195_2021_809_MOESM2_ESM.pdf]
